1  
2  
3  
4  
5  
6  
7  
8  
9  
10  
11  
12  
13  
14  
15  
16  
17  
18  
19  
20  
21  
22  
23  
24  
25  
26  
27

## A rational theory of set size effects in working memory and attention

Ronald van den Berg<sup>1</sup> and Wei Ji Ma<sup>2</sup>

<sup>1</sup>Department of Psychology, University of Uppsala, Uppsala, Sweden.

<sup>2</sup>Center for Neural Science and Department of Psychology, New York University, New York, USA

**Running head:** A rational theory of set size effects

### **Keywords**

Working memory, attention, ecological rationality, normative models

### **Corresponding author**

Ronald van den Berg

Department of Psychology

Von Kraemers Allé 1A, 75237

Uppsala, Sweden

Tel: +46184717277

E-mail: [ronald.vandenberg@psyk.uu.se](mailto:ronald.vandenberg@psyk.uu.se)

## 28 **ABSTRACT**

29 **The precision with which items are encoded in working memory and attention decreases with**  
30 **the number of encoded items. Current theories typically account for this “set size effect” by**  
31 **postulating a hard constraint on the allocated amount of encoding resource. While these**  
32 **theories have produced models that are descriptively successful, they offer no principled**  
33 **explanation for the very existence of set size effects: given their detrimental consequences for**  
34 **behavioral performance, why have these effects not been weeded out by evolutionary**  
35 **pressure, by allocating resources proportionally to the number of encoded items? Here, we**  
36 **propose a theory that is based on an ecological notion of rationality: set size effects are the**  
37 **result of a near-optimal trade-off between behavioral performance and the neural costs**  
38 **associated with stimulus encoding. We derive models for four visual working memory and**  
39 **attention tasks and show that they account well for data from eleven previously published**  
40 **experiments. Moreover, our results suggest that the total amount of resource that subjects**  
41 **allocate for stimulus encoding varies non-monotonically with set size, which is consistent with**  
42 **our rational theory of set size effects but not with previous descriptive theories. Altogether,**  
43 **our findings suggest that set size effects may have a rational basis and highlight the**  
44 **importance of considering ecological costs in theories of human cognition.**

45

## 46 **INTRODUCTION**

47 Human cognition is strongly constrained by set size effects in working memory and attention: the  
48 precision with which these systems encode information rapidly declines with the number of items,  
49 as observed in for example delayed estimation, change detection, visual search, and multiple-object  
50 tracking tasks (Ma & Huang, 2009; Ma, Husain, & Bays, 2014; Mazyar, van den Berg, & Ma, 2012;  
51 Mazyar, Van den Berg, Seilheimer, & Ma, 2013; J Palmer, 1990; John Palmer, 1994; Shaw, 1980;  
52 Wilken & Ma, 2004). By contrast, set size effects seem to be absent in long-term memory, where  
53 fidelity has been found to be independent of set size (Brady, Konkle, Gill, Oliva, & Alvarez, 2013).  
54 The existence of set size effects is thus not a general property of stimulus encoding, but a  
55 phenomenon that requires explanation. Despite an abundance of models, such an explanation is still  
56 lacking.

57 A common way to model set size effects has been to assume that stimuli are encoded using a  
58 fixed total amount of resources, formalized as “samples” (Lindsay, Taylor, & Forbes, 1968; J  
59 Palmer, 1990; Sewell, Lilburn, & Smith, 2014; Shaw, 1980), slots (Zhang & Luck, 2008),

60 information bit rate (C. R. Sims, Jacobs, & Knill, 2012), Fisher information (Ma & Huang, 2009),  
61 or neural firing (Bays, 2014): the larger the number of encoded items, the lower the amount of  
62 resource available for each item and, therefore, the lower the precision per item. These models  
63 make a very specific prediction about set size effects: encoding precision is inversely proportional  
64 to set size. It has been found that this prediction is often inconsistent with empirical data, which has  
65 led more recent models to instead use a power law to describe set size effects (Bays, Catalao, &  
66 Husain, 2009; Bays & Husain, 2008; Devkar & Wright, 2015; Donkin, Kary, Tahir, & Taylor,  
67 2016; Elmore et al., 2011; Keshvari, van den Berg, & Ma, 2013; Mazyar et al., 2012; van den Berg,  
68 Awh, & Ma, 2014; van den Berg, Shin, Chou, George, & Ma, 2012; Wilken & Ma, 2004). These  
69 more flexible power-law models tend to provide excellent fits to experimental data, but they have  
70 been criticized for lacking a principled motivation (Oberauer, Farrell, Jarrold, & Lewandowsky,  
71 2016; Oberauer & Lin, 2017). Hence, previous research has evolved to power-law models that  
72 accurately describe *how* precision in working memory and attention depends on set size, but a  
73 principled theory that explains *why* these effects are best described by a power law – and why they  
74 exist at all – is still lacking. While there seems little room for further improvement in the descriptive  
75 power of these models, finding rational or normative answers to these more fundamental questions  
76 can deepen our understanding of the very origin of encoding limitations in working memory and  
77 attention.

78         Although several previous studies have used normative or rational theories to explain certain  
79 aspects of working memory and attention, none of them has accounted for set size effects in a  
80 principled way. One example is our own previous work on visual search (Mazyar et al., 2012,  
81 2013), change detection (Keshvari, van den Berg, & Ma, 2012; Keshvari et al., 2013), and change  
82 localization (van den Berg et al., 2012), where we modelled the decision stage using optimal-  
83 observer theory, while assuming an ad hoc power law to model the relation between encoding  
84 precision and set size. Another example is the work by Sims and colleagues, who developed a  
85 normative framework in which working memory and perceptual systems are conceptualized as  
86 optimally performing information channels (C. R. Sims, 2016; C. R. Sims et al., 2012). Their  
87 framework offers parsimonious explanations for several aspects of stimulus encoding in visual  
88 working memory, such as the relation between stimulus variability and encoding precision (C. R.  
89 Sims et al., 2012) and the non-Gaussian shape of encoding noise (C. R. Sims, 2015). However, their  
90 framework does not offer a normative explanation of set size effects. In their early work (C. R. Sims  
91 et al., 2012) they accounted for these effects by assuming that total information capacity is fixed,

92 which is similar to other fixed-resource models and predicts an inverse proportionality between  
93 encoding precision and set size. In their later work (A Emin Orhan, Sims, Jacobs, Knill, & Orhan,  
94 2014; C. R. Sims, 2016) they add to this the assumption that there is an inefficiency in distributing  
95 capacity across items and fit capacity as a free parameter at each set size. Neither of their  
96 assumptions is motivated by normative arguments.

97 Here, we propose that set size effects may be a near-optimal solution to an ecological trade-  
98 off. The starting point for our theory is the principle that stimulus encoding is costly (Attwell &  
99 Laughlin, 2001; Lennie, 2003; Sterling & Laughlin, 2015), which may have pressured the brain to  
100 balance behavioral benefits of high precision against neural costs (Christie & Schrater, 2015;  
101 Lennie, 2003; Ma & Huang, 2009; Pestilli & Carrasco, 2005). Indeed, consistent with this idea, it  
102 has been found that performance on perceptual decision-making tasks can be improved by  
103 increasing monetary reward (Baldassi & Simoncini, 2011; Della Libera & Chelazzi, 2006; Peck,  
104 Jangraw, Suzuki, Efem, & Gottlieb, 2009). However, what level of encoding precision establishes a  
105 good balance may depend not only on the level of reward, but possibly also on task-related factors  
106 such as set size. Based on these considerations, we hypothesize that set size effects are the result of  
107 an ecologically rational or normative strategy that balances behavioral performance against  
108 encoding costs. We next formalize this hypothesis, derive models from it for four visual working  
109 memory and attention tasks, and fit them to data from eleven previously published experiments.

110

## 111 **THEORY**

112 We first formalize and test our theory in the context of the delayed-estimation paradigm (Wilken &  
113 Ma, 2004) and will later examine its generalization to other tasks. In single-probe delayed-  
114 estimation tasks, subjects briefly hold a set of items in memory and report their estimate of a  
115 randomly chosen target item (Fig. 1A; Table 1). Estimation error  $\varepsilon$  is the (circular) difference  
116 between the subject's estimate and the true stimulus value  $s$ . Set size effects in this task manifest  
117 itself as a widening of the estimation error distribution (Fig. 1B). As in previous work (Keshvari et  
118 al., 2012, 2013, Mazyar et al., 2012, 2013, van den Berg et al., 2014, 2012), we assume that a  
119 memory  $x$  follows a Von Mises distribution with mean  $s$  and concentration parameter  $\kappa$ , and define  
120 encoding precision  $J$  as Fisher information (Cover & Thomas, 2005), which is one-to-one related to  
121  $\kappa$  (see Supplementary Information). We assume that response noise is negligible, such that the  
122 estimation error is equal to the memory error,  $\varepsilon=x-s$ . Moreover, we assume variability in  $J$  across  
123 items and trials (Fougnie, Suchow, & Alvarez, 2012; Keshvari et al., 2012; Mazyar et al., 2012; van

124 den Berg et al., 2014, 2012), which we model using a gamma distribution with a mean  $\bar{J}$  and a  
 125 scale parameter  $\tau$  (see Supplementary Information).

126

127

128

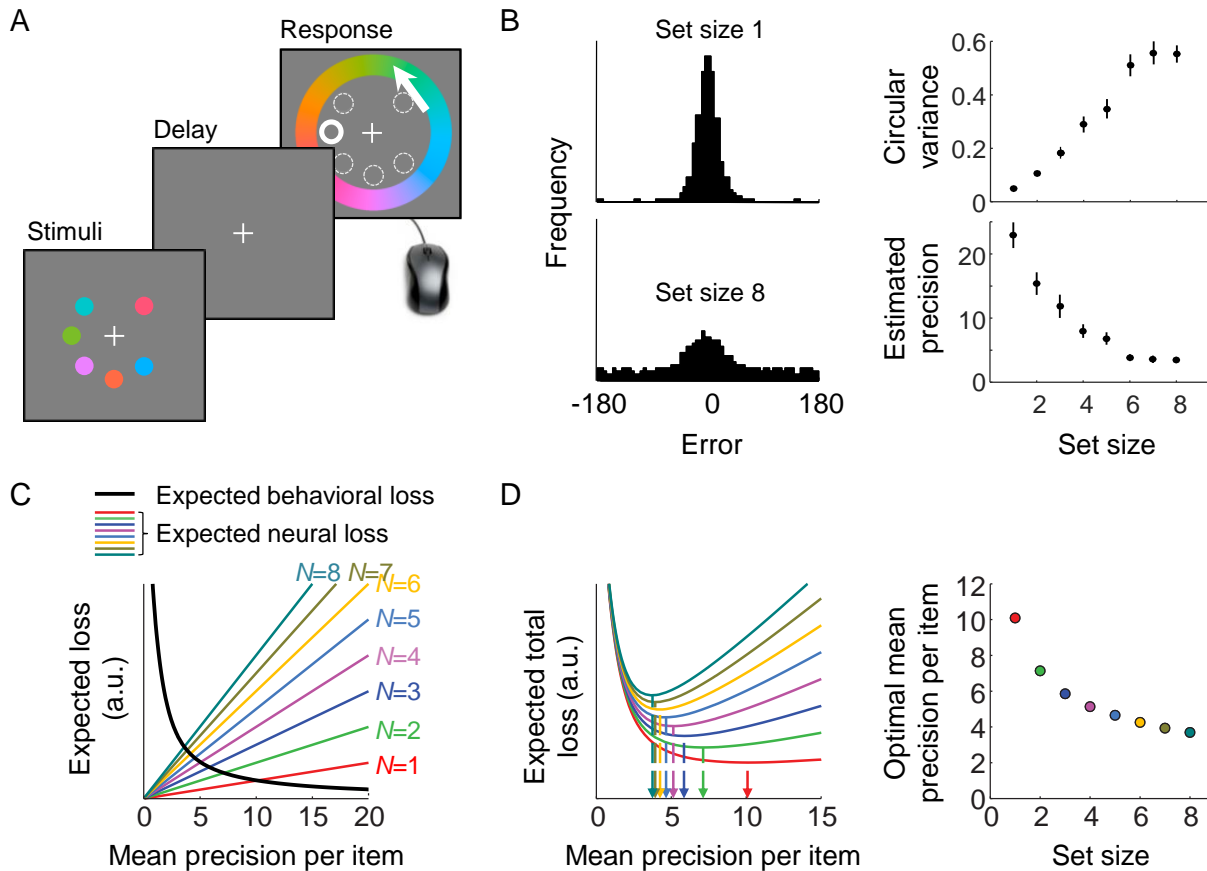

**Figure 1. An ecologically rational model of set size effects in delayed estimation.** (A) Example of a delayed-estimation experiment. The subject is briefly presented with a set of stimuli and, after a short delay, reports the value of a randomly chosen target item. (B) Estimation error distributions widen with set size, suggesting a decrease in encoding precision (data from Experiment DE5 in Table 1; estimated precision computed in the same way as in Fig. 3A). (C) Stimulus encoding is assumed to be associated with two kinds of loss: a behavioral loss that decreases with encoding precision and a neural loss that is proportional to both set size and precision. In the delayed-estimation task, the expected behavioral error loss is independent of set size. (D) Total expected loss has a unique minimum that depends on the number of remembered items. The mean precision per item that minimizes expected total loss is referred to as the optimal mean precision (arrows) and decreases with set size. The parameter values used to produce panels C and D were  $\lambda=0.01$ ,  $\beta=2$ , and  $\tau \downarrow 0$ .

129

130

131 *Table 1. Overview of experimental datasets used. Task responses were continuous in the delayed-*  
 132 *estimation experiments and categorical in the other tasks. DE5 and DE6 differed in the way color*  
 133 *was reported (DE5: color wheel; DE6: scroll).*

| Experiment | Reference                   | Task                | Feature     | Set sizes  | #subj |
|------------|-----------------------------|---------------------|-------------|------------|-------|
| DE1        | (Wilken & Ma, 2004)         | Delayed estimation  | Color       | 1, 2, 4, 8 | 15    |
| DE2        | (Zhang & Luck, 2008)        | Delayed estimation  | Color       | 1, 2, 3, 6 | 8     |
| DE3        | (Bays et al., 2009)         | Delayed estimation  | Color       | 1, 2, 4, 6 | 12    |
| DE4        | (van den Berg et al., 2012) | Delayed estimation  | Orientation | 1-8        | 6     |
| DE5        | (van den Berg et al., 2012) | Delayed estimation  | Color       | 1-8        | 13    |
| DE6        | (van den Berg et al., 2012) | Delayed estimation  | Color       | 1-8        | 13    |
| CD1        | (Keshvari et al., 2013)     | Change detection    | Color       | 1, 2, 4, 8 | 7     |
| CD2        | (Keshvari et al., 2013)     | Change detection    | Orientation | 2, 4, 6, 8 | 10    |
| CL1        | (van den Berg et al., 2012) | Change localization | Color       | 2, 4, 6, 8 | 7     |
| CL2        | (van den Berg et al., 2012) | Change localization | Orientation | 2, 4, 6, 8 | 11    |
| VS         | (Mazyar et al., 2013)       | Visual search       | Orientation | 1, 2, 4, 8 | 6     |

134  
 135

136 The key novelty of our theory is the idea that stimuli are encoded with a level of mean  
 137 precision,  $\bar{J}$ , that minimizes a combination of *behavioral loss* and *neural loss*. Behavioral loss is  
 138 induced by making an error  $\varepsilon$ , which we formalize using a mapping  $L_{\text{behavioral}}(\varepsilon)$ . This mapping may  
 139 depend on both internal incentives (e.g., intrinsic motivation) and external ones (e.g., the reward  
 140 scheme imposed by the experimenter). For the moment, we choose a power-law function,  
 141  $L_{\text{behavioral}}(\varepsilon) = |\varepsilon|^\beta$  with  $\beta > 0$  as a free parameter, such that larger errors correspond with larger loss. The  
 142 *expected* behavioral loss, denoted  $\bar{L}_{\text{behavioral}}$ , is obtained by averaging loss across all possible errors,  
 143 weighted by the probability that each error occurs,

144

$$145 \quad \bar{L}_{\text{behavioral}}(\bar{J}, N) = \int L_{\text{behavioral}}(\varepsilon) p(\varepsilon | \bar{J}, N) d\varepsilon, \quad (1)$$

146

147 where  $p(\varepsilon | \bar{J}, N)$  is the estimation error distribution for given mean precision and set size. In  
 148 single-probe delayed-estimation tasks, the expected behavioral loss is independent of set size and  
 149 subject to the law of diminishing returns (Fig. 1C, black curve).

150 A second kind of loss is the energetic expenditure incurred by representing a stimulus. Since  
151 this loss is primarily rooted in neural spiking activity, we refer to it as “neural loss” and use neural  
152 theory to make an estimate of the relation between encoding precision and neural loss. For many  
153 choices of spike variability, including the common one of Poisson-like variability (Ma, Beck,  
154 Latham, & Pouget, 2006), the precision (Fisher information) of a stimulus encoded in a neural  
155 population is proportional to the trial-averaged neural spiking rate (Paradiso, 1988; Seung &  
156 Sompolinsky, 1993). Moreover, it has been estimated that the energetic loss induced by each spike  
157 increases with spiking rate (Attwell & Laughlin, 2001; Lennie, 2003). When combining these two  
158 premises, the expected neural loss associated with the encoding of an item is a supralinear function  
159 of encoding precision. However, to minimize free model parameters, we assume for the moment  
160 that the function is linear (at the end of this section we present a mathematical proof that the main  
161 qualitative prediction of our theory generalizes to any supralinear function). Further assuming that  
162 stimuli are encoded independently of each other, expected neural loss is also proportional to the  
163 number of encoded items,  $N$ . We thus obtain

$$164 \bar{L}_{\text{neural}}(\bar{J}, N) = \alpha \bar{J} N, \quad (2)$$

166 where  $\alpha$  is a free parameter that represents the amount of neural loss incurred by a unit increase in  
167 mean precision (Fig. 1C, colored lines).

169 We combine the two types of expected loss into a total expected loss function (Fig. 1D),

$$170 \bar{L}_{\text{total}}(\bar{J}, N) = \bar{L}_{\text{behavioral}}(\bar{J}, N) + \lambda \bar{L}_{\text{neural}}(\bar{J}, N) \\ 171 = \bar{L}_{\text{behavioral}}(\bar{J}, N) + \lambda \alpha \bar{J} N, \quad (3)$$

172 where the weight  $\lambda \geq 0$  represents the importance of keeping neural loss low relative to the  
173 importance of good performance. Since  $\lambda$  and  $\alpha$  have interchangeable effects on the model  
174 predictions, they can be fitted as a single free parameter  $\tilde{\lambda} \triangleq \lambda \alpha$ . We refer to the level of mean  
175 precision that minimizes the total expected loss as *optimal mean precision*,

$$176 \bar{J}_{\text{optimal}}(\bar{J}, N) = \underset{J}{\operatorname{argmin}} \bar{L}_{\text{total}}(\bar{J}, N). \quad (4)$$

179

180 Under the loss functions proposed above, we find that  $\bar{J}_{\text{optimal}}$  is a decreasing function of set size  
181 (Fig. 1D), which is qualitatively consistent with set size effects observed in experimental data (cf.  
182 Fig. 1B).

183

## 184 **Generality**

185 When formalizing the loss functions, we had to make specific assumptions about how behavioral  
186 errors map to behavioral loss and encoding precision to neural loss. Since these assumptions cannot  
187 yet be fully empirically substantiated, it is important to verify that our theory generalizes to other  
188 choices that we could have made. To this end, we asked under what conditions our general theory,  
189 Eq. (4), predicts a set size effect (i.e., a decline of encoding precision with set size). A mathematical  
190 proof (see Supplementary Materials) shows that the following four conditions are sufficient: (i) the  
191 expected behavioral loss is a strictly decreasing function of encoding precision, i.e., an increase in  
192 precision results in an increase in performance; (ii) the expected behavioral loss is subject to a law  
193 of diminishing returns (Mankiw, 2004): the higher the initial precision, the smaller the behavioral  
194 benefit obtained from an increase in precision; (iii) the expected neural loss is an increasing  
195 function of encoding precision; (iv) the expected neural loss associated with a fixed increase in  
196 precision increases with precision. Hence, the conditions under which our theory predicts set size  
197 effects are not limited to the specific loss functions that we formulated here, but represent a broad  
198 range of choices.

199

## 200 **RESULTS**

201

### 202 **Model fits**

203 To evaluate whether our theory can quantitatively account for experimental data, we fit the model  
204 formulated above to 67 individual-subject data sets from a delayed-estimation benchmark set<sup>\*</sup>  
205 (Table 1). The maximum-likelihood fit accounts well for the raw error distributions (Fig. 2A) and  
206 the two statistics that summarize these distributions (Fig. 2B). Hence, these data are consistent with  
207 the theory that set size effects are the result of an ecologically rational trade-off between behavioral

---

\* The original benchmark set (van den Berg et al., 2014) contains 10 data sets with a total of 164 individuals. Two of these data sets were published in papers that later got retracted and another one contained data for only two set sizes, which is not very informative for our present purposes. While our model accounts well for these data sets (Fig. S1 in Supplementary Information), we decided to exclude them from the main analyses.



208 performance and neural cost. Maximum-likelihood estimates of the three model parameters ( $\tilde{\lambda}$ ,  $\tau$ ,  
 209 and  $\beta$ ) are provided in Supplementary Table S1.  
 210

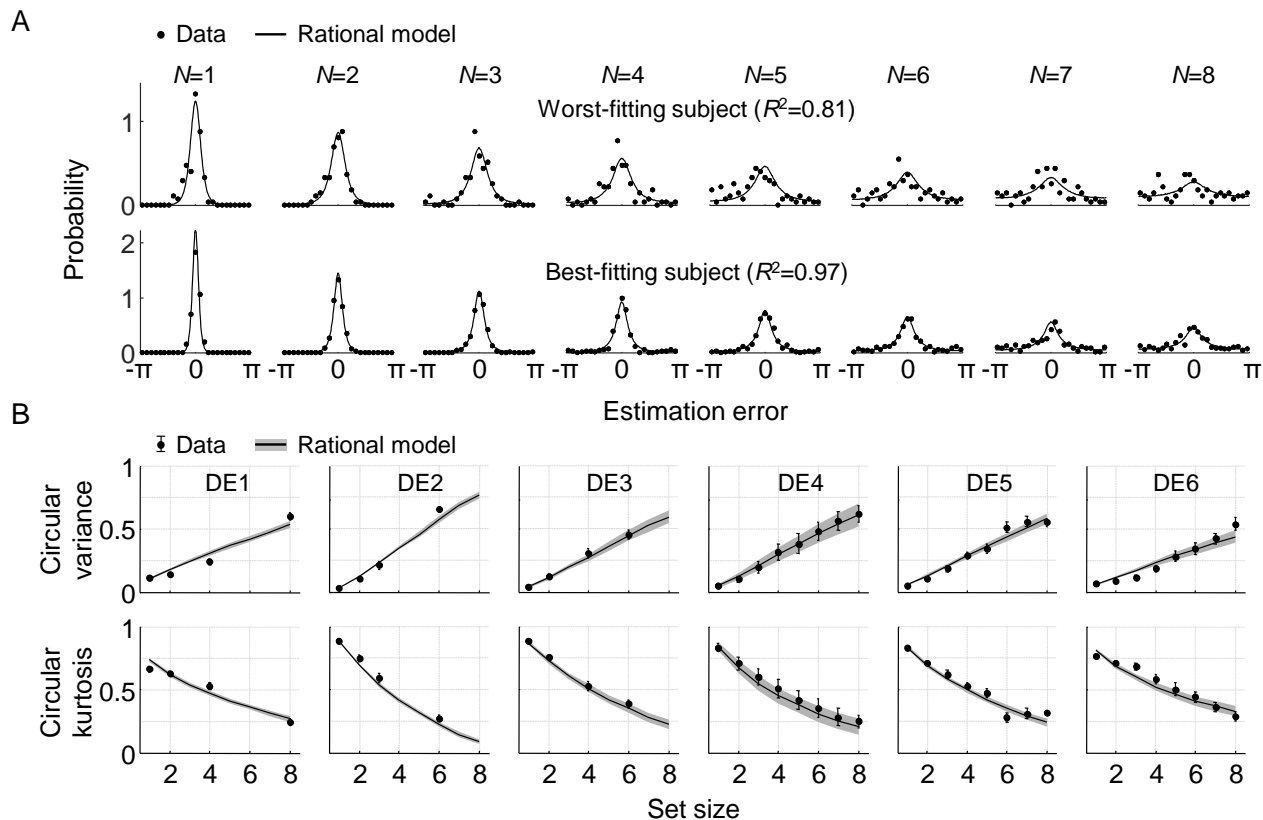

**Figure 2. Model fits to data from six delayed-estimation experiments.** (A) Maximum-likelihood fits to raw data of the worst-fitting and best-fitting subjects. Goodness of fit was measured as  $R^2$ , computed for each subject by concatenating histograms across set sizes. (B) Subject-averaged fits to the two statistics that summarize the estimation error distributions (circular variance and kurtosis) as a function of set size, split by experiment. Here and in subsequent figures, error bars and shaded areas represent 1 s.e.m. of the mean across subjects.

211

212

### 213 Comparison with a power-law model and an unconstrained model

214 To compare the goodness of fit of this model with that of previously proposed descriptive models,  
 215 we next fit the same data using a model variant in which the relation between encoding precision  
 216 and set size is assumed to be a power law. This variant is identical to the VP-A model in our earlier  
 217 work (van den Berg et al., 2014). Model comparison based on the Akaike Information Criterion  
 218 (AIC) (Akaike, 1974) indicates that the goodness of fit is comparable between the two models, with  
 219 a small advantage for the rational model ( $\Delta\text{AIC}=5.27\pm 0.70$ ; throughout the paper,  $X\pm Y$  indicates

220 mean±s.e.m. across subjects). Hence, the rational model provides a principled explanation of set  
 221 size effects without sacrificing quality of fit compared to previous descriptive models.

222 To get an indication of the absolute goodness of fit of the rational model, we next examine  
 223 how much room for improvement there is in the fits. We do this by fitting a model variant in which  
 224 memory precision is a free parameter at each set size, while keeping all other aspects of the model  
 225 the same (note that this model variant purely serves as a descriptive tool to obtain estimates of the  
 226 empirical precision values, not as a process model of set size effects in visual working memory).  
 227 We find a marginal AIC difference ( $\Delta AIC=3.49\pm 0.93$ , in favor of the unconstrained model), which  
 228 indicates that the fits of the rational model are close to the best possible fits. This finding is  
 229 corroborated by examination of the fitted parameter values: the estimated precision values in the  
 230 unconstrained model closely match the precision values in the rational model (Fig. 3A).  
 231

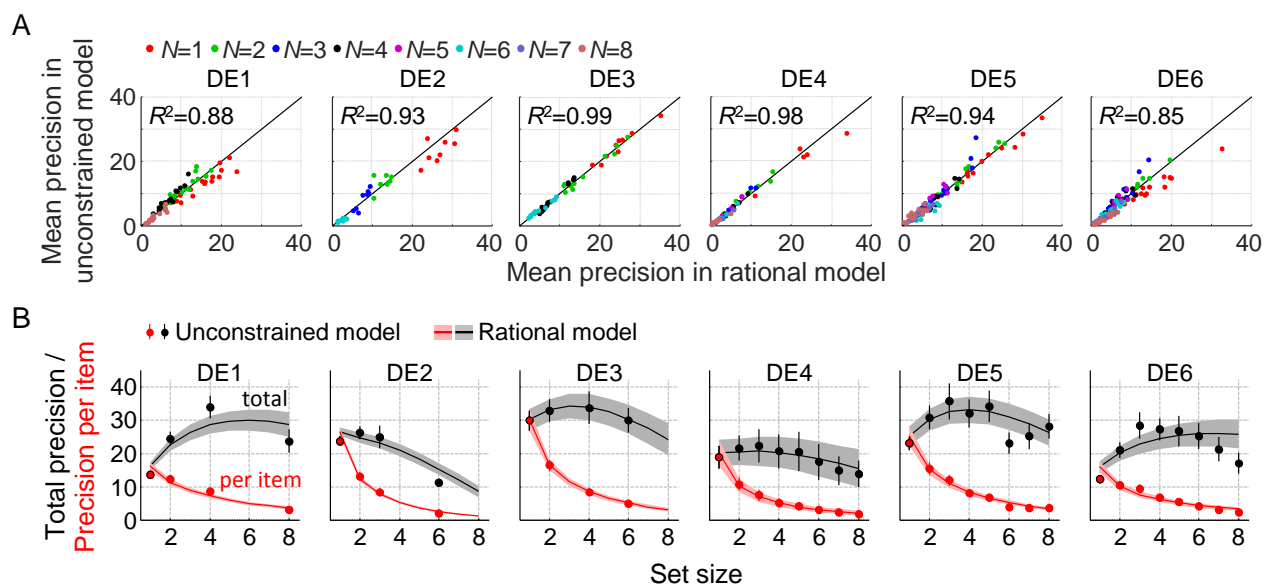

**Figure 3. Estimated encoding precision in the delayed-estimation experiments.** (A) Best-fitting precision values in the rational model scattered against the best-fitting precision values in the unconstrained model. Each dot represents the estimates for a single subject. (B) Estimated mean encoding precision per item (red) and total encoding precision (black) plotted against set size.

232

233

### 234 Total precision as a function of set size

235 One feature that sets our rational theory apart from previous theories is that it does not predict a  
 236 trivial relationship between the total amount of allocated encoding resource and set size. To see this,  
 237 we quantify the amount of allocated resources as the precision per item summed across all items,

238  $\bar{J}_{\text{total}} \triangleq \bar{J}N$ . In fixed-resource models, this quantity is by definition constant and in power-law  
239 models it varies monotonically with set size. By contrast, we find that in the fits to several of the  
240 delayed-estimation experiments, total precision in the rational model varies *non-monotonically* with  
241 set size (Fig. 3B, gray curves). To examine whether there is evidence for such non-monotonic  
242 behavior in the subject data, we use the fitted precision values from the unconstrained model as our  
243 best empirical estimates of the precision with which subjects encoded items. We find that these  
244 empirical estimates show signs of similar non-monotonic relations in some of the experiments (Fig.  
245 3B, black circles). To quantify this statistically, we performed Bayesian paired t-tests (JASP\_Team,  
246 2017) to compare the empirical  $\bar{J}_{\text{total}}$  estimates at set size 3 with the estimates at set sizes 1 and 6 in  
247 the experiments that included these set sizes (DE2 and DE4-6; Table 1). These tests reveal strong  
248 evidence that total precision at set size 3 is higher than total precision at both set sizes 1  
249 ( $\text{BF}_{+0}=1.05 \cdot 10^7$ ) and 6 ( $\text{BF}_{+0}=4.02 \cdot 10^2$ ). Moreover, across all six experiments, the subject-averaged  
250 set size at which  $\bar{J}_{\text{total}}$  is highest in the unconstrained model is  $3.52 \pm 0.18$ . These findings suggest  
251 that the total amount of resources that subjects allocate for stimulus encoding varies non-  
252 monotonically with set size, which is consistent with our rational model but not with previous  
253 descriptive models. To the best of our knowledge, this non-monotonic behavior has not been  
254 reported before and may be used to further constrain models of visual working memory and  
255 attention.

256

### 257 **Alternative loss functions**

258 To evaluate the necessity of a free parameter in the behavioral loss function,  $L_{\text{behavioral}}(\varepsilon)$ , we also  
259 test the following three parameter-free choices:  $|\varepsilon|$ ,  $\varepsilon^2$ , and  $-\cos(\varepsilon)$ . Model comparison favors the  
260 original model with AIC differences of  $14.0 \pm 2.8$ ,  $24.4 \pm 4.1$ , and  $19.5 \pm 3.5$ , respectively. While there  
261 may be other parameter-free functions that give better fits, we expect that a free parameter is  
262 unavoidable here, as it is likely that the error-to-loss mapping differs across experiments (due to  
263 differences in external incentives) and possibly also across subjects within an experiment (due to  
264 differences in internal incentives). We also test a two-parameter function that was proposed recently  
265 (Eq. (5) in (C. R. Sims, 2015)). The main difference with our original choice is that this alternative  
266 function allows for saturation effects in the error-to-loss mapping. However, this extra flexibility  
267 does not increase the goodness of fit sufficiently to justify the additional parameter, as the original  
268 model outperforms this variant with an AIC difference of  $5.3 \pm 1.8$ .

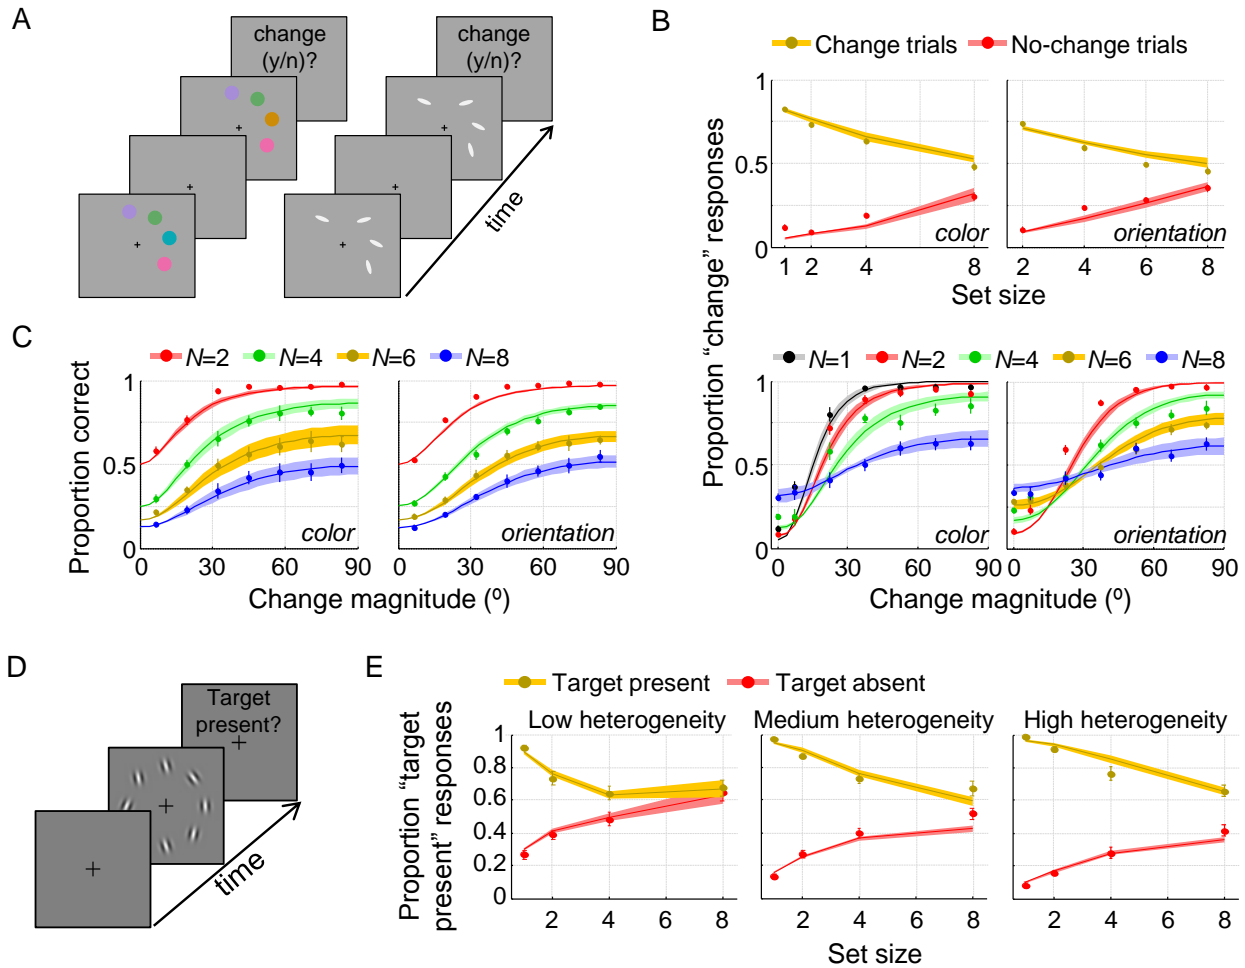

**Figure 4. Model fits to three categorical decision-making tasks.** (A) Experimental paradigm in the change-detection experiments. The paradigm for change localization was the same, except that a change was present on each trial and subjects reported the location of change. (B) Model fits to change-detection data. Top: hit and false alarm rates; bottom: psychometric curves. (C) Model fits to change-localization data. (D) Experimental paradigm in the visual-search experiment. (E) Model fits to visual-search data. Note that all models were fitted to raw response data, not to the summary statistics visualized here (see Methods).

269

## 270 Generalization to other tasks

271 We next examine the generality of our theory, by testing whether it can also explain set size effects  
 272 in two change detection tasks (Table 1). In these experiments, the subject is on each trial  
 273 sequentially presented with two sets of stimuli and reports whether there was a change at any of the  
 274 stimulus locations (Fig. 4A). A change was present on half of the trials, at a random location and  
 275 with a random change magnitude. The behavioral error,  $\varepsilon$ , takes only two values in this task:  
 276 “correct” and “incorrect”. Therefore,  $p(\varepsilon | \bar{J}, N)$  specifies the probabilities of correct and incorrect  
 277 responses for a given level of precision and set size, which depend on the observer’s decision rule.  
 278 Following previous work (Keshvari et al., 2012, 2013), we assume that subjects use the Bayes-

279 optimal rule (see Supplementary Information) and that there is random variability in encoding  
280 precision. This decision rule introduces one free parameter,  $p_{\text{change}}$ , specifying the subject's prior  
281 belief that a change will occur. Due to the binary nature of  $\varepsilon$  in this task, the free parameter of the  
282 behavioral loss function drops out of the model, as its effect is equivalent to changing parameter  $\tilde{\lambda}$   
283 (see Supplementary Information). The model thus has three free parameters ( $\tilde{\lambda}$ ,  $\tau$ , and  $p_{\text{change}}$ ). We  
284 find that the maximum-likelihood fits account well for the data in both experiments (Fig. 4B).

285         So far, we have considered tasks with continuous and binary judgments. We next consider  
286 two change localization experiments (Table 1) in which judgments are non-binary but categorical.  
287 The task is identical to change detection, except that a change is present on every trial and the  
288 observer reports the location at which the change occurred (out of 2, 4, 6, or 8 locations). We again  
289 assume variable precision and an optimal decision rule (see Supplementary Information). Although  
290 the rational model has only two free parameters ( $\tilde{\lambda}$  and  $\tau$ ), it accounts well for both datasets (Fig.  
291 4C).

292         The final task to which we apply our theory is a visual search experiment (Mazyar et al.,  
293 2013) (Table 1). Unlike the previous three tasks, this is not a working memory task, as there was no  
294 delay period between stimulus offset and response. Set size effects in this experiment are thus likely  
295 to stem from limitations in attention rather than memory, but our theory applies without any  
296 additional assumptions. Subjects judged whether a vertical target was present among one of  $N$   
297 briefly presented oriented ellipses (Fig. 4D). The distractors were drawn from a Von Mises  
298 distribution centered at vertical. The width of the distractor distribution determined the level of  
299 heterogeneity in the search display. Each subject was tested under three different levels of  
300 heterogeneity. We again assume variable precision and an optimal decision rule (see Supplementary  
301 Information). This decision rule has one free parameter,  $p_{\text{present}}$ , specifying the subject's prior degree  
302 of belief that a target will be present. We fit the three free parameters ( $\tilde{\lambda}$ ,  $\tau$ , and  $p_{\text{present}}$ ) to the data  
303 from all three heterogeneity conditions at once and find that the model accounts well for the  
304 dependencies of the hit and false alarm rates on both set size and distractor heterogeneity (Fig. 4E).

305

## 306 **DISCUSSION**

307 Descriptive models of visual working memory and attention have evolved to a point where there is  
308 little room for improvement in how well they account for experimental data. However, the basic  
309 fact that encoding precision decreases with increasing set size still lacks a principled explanation.

310 Here, we examined a possible explanation based on normative and ecological considerations: set  
311 size effects may be the result of a rational trade-off between behavioral performance and costs  
312 induced by stimulus encoding. The models that we derived from this hypothesis account well for  
313 data across a range of quite different tasks, despite having relatively few parameters. Moreover,  
314 they account for a non-monotonicity that appears to exist between in the relation between set size  
315 and the total amount of resources that subjects allocate for stimulus encoding.

316 While the main purpose of our study was to make a conceptual advancement – by providing a  
317 principled theory for a phenomenon that has thus far been approached only descriptively –  
318 consideration of additional mechanisms could further improve the fits and lead to more complete  
319 models. For example, previous studies have incorporated response noise (van den Berg et al., 2014,  
320 2012), non-target responses (Bays et al., 2009), and a (variable) limit on the number of remembered  
321 items (Dyrholm, Kyllingsbæk, Espeseth, & Bundesen, 2011; C. R. Sims et al., 2012; van den Berg  
322 et al., 2014) to improve fits. These mechanisms have not been motivated in a principled manner, but  
323 it might be possible to treat some of them using a rational approach similar to the one that we took  
324 here. For example, the level of response noise might be set by optimizing a trade-off between  
325 performance and motor control effort (Wolpert & Landy, 2012) and slot-like encoding could be a  
326 rational strategy if spreading encoding resources over multiple items incurs a metabolic loss, as has  
327 been suggested by previous work (Scalf & Beck, 2010).

328 More broadly, our work speaks to the relation between descriptive and rational theories in  
329 psychology and neuroscience. The main motivation for rational theories is to reach a deeper level of  
330 understanding by analyzing a system in the context of the ecological needs and constraints that it  
331 evolved under. Besides the large literature on ideal-observer decision rules (Geisler, 2011; Green &  
332 Swets, 1966; Körding, 2007; Shen & Ma, 2016), rational approaches have been used to explain  
333 properties of receptive fields (Liu, Stevens, & Sharpee, 2009; Olshausen & Field, 1996; Vincent,  
334 Baddeley, Troscianko, & Gilchrist, 2005), tuning curves (Attneave, 1954; Barlow, 1961; Ganguli &  
335 Simoncelli, 2010), neural wiring (Cherniak, 1994; Chklovskii, Schikorski, & Stevens, 2002), and  
336 neural network modularity (Clune, Mouret, & Lipson, 2013). A transition from descriptive to  
337 rational explanations might be an essential step in the maturation of theories of biological systems,  
338 and in psychology there certainly seems to be more room for this kind of explanation.

339 An alternative explanation of set size effects has been that the brain is unable to keep neural  
340 representations of multiple items segregated from one another (Endress & Szabó, 2017; Nairne,  
341 1990; Oberauer & Lin, 2017; A E Orhan & Ma, 2015; Z. Wei, Wang, & Wang, 2012): as the

342 number of encoded items increases, so does the level of interference in their representations,  
343 resulting in lower task performance. However, these models offer no principled justification for the  
344 existence of interference and some require additional mechanisms to account for set size effects; for  
345 example, the model by Oberauer and colleagues requires three additional components – including a  
346 set-size dependent level of background noise – to fully account for set size effects (Oberauer & Lin,  
347 2017). That being said, we do not deny there may be interference effects in working memory and  
348 adding them to models we presented here may improve their goodness of fit.

349 Our approach shares both similarities and differences with the concept of bounded rationality  
350 (Simon, 1957), which states that human behavior is guided by mechanisms that provide “good  
351 enough” solutions rather than optimal ones. The main similarity is that both approaches  
352 acknowledge that human behavior is constrained by various cognitive limitations. However, an  
353 important difference is that in the theory of bounded rationality, these limitations are postulates or  
354 axioms, while our approach explains them as rational outcomes of ecological optimization  
355 processes. This suggestion that cognitive limitations are subject to optimization instead of fixed  
356 may also have implications for theories outside the field of psychology. In the theory of “rational  
357 inattention” in behavioral economics, agents make optimal decisions under the assumption that  
358 there is a fixed limit on the total amount of attention that they can allocate to process economic data  
359 (C. A. Sims, 2003). This fixed-attention assumption is similar to the fixed-resource assumption in  
360 models of visual working memory and it could be interesting to explore the possibility that the  
361 amount of allocable attention is the outcome of a trade-off between expected economic performance  
362 and the expected cost induced by allocating attention to process economic data.

363 While our results show that set size effects can in principle be explained as the result of an  
364 optimization strategy, they do not necessarily imply that encoding precision is fully optimized on  
365 every trial in any given task. First, encoding precision in the brain most likely has an upper limit,  
366 due to irreducible sources of noise such as Johnson noise and Poisson shot noise (Faisal, Selen, &  
367 Wolpert, 2008; Smith, 2015), as well as suboptimalities early in sensory processing (Beck, Ma,  
368 Pitkow, Latham, & Pouget, 2012). This prohibits the brain from reaching the near-perfect  
369 performance levels that our model predicts when the behavioral loss associated to errors is huge.  
370 Second, precision might have a lower limit: task-irrelevant stimuli are sometimes automatically  
371 encoded (Shin & Ma, 2016; Yi, Woodman, Widders, Marois, & Chun, 2004), perhaps because in  
372 natural environments few stimuli are ever completely irrelevant. This would prevent subjects from  
373 sometimes encoding nothing at all, in contradiction to what our theory predicts to happen at very

374 large set sizes. Third, all models that we tested incorporated variability in encoding precision. Part  
375 of this variability is possibly due to stochastic factors such as neural noise, but part of it may also be  
376 systematic in nature (e.g., particular colors and orientations may be encoded with higher precision  
377 than others (Bae, Allred, Wilson, & Flombaum, 2014; Girshick, Landy, & Simoncelli, 2011)).  
378 Whereas the systematic component could have a rational basis (e.g., higher precision for colors and  
379 orientations that occur more frequently in natural scenes (Ganguli & Simoncelli, 2010; X.-X. Wei &  
380 Stocker, 2015)), this is unlikely to be true for the random component. Indeed, when we jointly  
381 optimize  $\bar{J}$  and  $\tau$ , we find estimates of  $\tau$  that are consistently 0, meaning that any variability in  
382 encoding precision is suboptimal from the perspective of our model. Finally, even if set size effects  
383 are the result of a rational trade-off between behavioral and neural loss, it may be that the solution  
384 that the brain settled on works well on average, but is not tailored to provide an optimal solution in  
385 every possible situation. In that case, set size effects could be more rigid across environmental  
386 changes (e.g., in task or reward structure) than predicted by a model that incorporates every such  
387 change in a fully optimal manner.

388 One way to assess the plausibility and generality of a model is by examining whether variations  
389 in parameters map in a meaningful way to variations in experimental methods. Unfortunately, this  
390 approach was not possible here, because both the subject populations and experimental methods  
391 varied on a considerable number of dimensions across experiments, including stimulus time and  
392 contrast, delay time, instructions, scoring function, and the type and amount of reward. More  
393 controlled studies could be performed to further evaluate our theory, by varying a specific  
394 experimental factor that is expected to affect one of the loss functions, while keeping all other  
395 factors the same. For example, one way to manipulate the behavioral loss function would be to  
396 impose an explicit scoring function and vary this function across conditions while keeping all other  
397 factors constant. Interestingly, a previous study that performed such a manipulation in a delayed-  
398 estimation experiment found a behavioral effect in one experiment (Zhang & Luck, 2011), but  
399 unfortunately they did not vary set size. Another way to manipulate the behavioral loss function in  
400 working memory tasks is to use a cue to indicate which item is most likely going to be probed.  
401 Previous studies that used this manipulation (Bays, 2014; Klyszejko, Rahmati, & Curtis, 2014)  
402 found increased encoding precision in cued items compared to uncued items, consistent with an  
403 ideal observer strategy. It would be interesting to examine whether our model can quantitatively  
404 account for such data. Moreover, an intuitive argument suggests that our theory predicts set size  
405 effects on the cued item to become weaker as a function of cue validity. At minimum cue validity –



406 which is equivalent to using no cue, as in the experiments analyzed in this paper – our model  
407 predicts a decline of encoding precision with set size. At maximum validity, however, the loss-  
408 minimizing strategy is obviously to always encode the cued item with the level of precision that  
409 would be optimal for set size 1, thus entirely eliminating a set size effect. Our model makes precise  
410 quantitative predictions about this transition from strong set size effects at low cue validity to no set  
411 size effects at maximum cue validity. Moreover, the predicted set size effects are likely to differ  
412 between the cued and uncued items, which could be tested using the same experiment.

413 A seemingly obvious way to experimentally manipulate the neural loss function would be to  
414 vary the delay period. However, the neural mechanisms underlying working memory maintenance  
415 are still debated, which makes it difficult to derive model predictions for this manipulation. One  
416 possibility is that working memories are maintained in persistent activity (Funahashi, Bruce, &  
417 Goldman-Rakic, 1989; Fuster & Alexander, 1971), in which case it would be reasonable to assume  
418 that the neural cost related to maintenance increases linearly with delay time. If there is no initial  
419 cost associated to creating a memory, then a doubling of delay time should have the same effect as a  
420 doubling of set size. However, if there is an initial cost on top of the maintenance cost, then the  
421 effect of increasing delay period will be milder, especially if the initial cost is high. Moreover, it is  
422 has been argued that working memories may be maintained by increasing residual calcium levels at  
423 presynaptic terminals, which temporarily enhances synaptic strength and avoids the need for  
424 enhanced spiking (Mongillo, Barak, & Tsodyks, 2008). This way, an increase in delay time would  
425 induce little extra cost and our theory would predict only a mild effect of delay time on encoding  
426 precision, even in the absence of an initial cost. A recent study that varied delay period in a delayed-  
427 estimation task (Pertzov, Manohar, & Husain, 2017) indeed found only modest effects of delay time  
428 on estimation error. However, given the uncertainties about the relation between maintenance time  
429 and total neural cost, it would be premature to draw strong conclusions from this finding.

430 Developmental work has shown that working memory capacity estimates change with age  
431 (Simmering, 2012; Simmering & Perone, 2012). Viewed from the perspective of our proposed  
432 theory, this raises the question why the optimal trade-off between behavioral and neural loss would  
433 change with age. A speculative answer could be that a subject's encoding efficiency (formalized by  
434 parameter  $\alpha$  in Eq. (2)) may improve during childhood. An increase in encoding efficiency (i.e.,  
435 lower  $\alpha$ ) has the same effect in our model as a decrease in the set size (i.e., higher  $N$ ), which we  
436 know is accompanied by an increase in optimal encoding precision. Hence, our model would

437 predict subjects to increase encoding precision over time, which is qualitatively consistent with the  
438 findings of the developmental studies.

439 Finally, our results raise the question what neural mechanisms could implement the kind of  
440 near-optimal resource allocation strategy that is the core of our theory. Some form of divisive  
441 normalization (Bays, 2014; Carandini & Heeger, 2012) would be a likely candidate, which is  
442 already a key operation in neural models of attention (Reynolds & Heeger, 2009) and visual  
443 working memory (Bays, 2014; Z. Wei et al., 2012). The essence of this mechanism is that it lowers  
444 the gain when set size is larger, without requiring knowledge of the set size prior to the presentation  
445 of the stimuli.

446

## 447 **METHODS**

### 448 **Data and code sharing**

449 All data analyzed in this paper and model fitting code are available at [url to be inserted].

450

### 451 **Model fitting**

452 *Delayed estimation.* We used Matlab's `fminsearch` function to find the parameter vector

453  $\boldsymbol{\theta} = \{\tilde{\lambda}, \beta, \tau\}$  that maximizes the log likelihood function,  $\sum_{i=1}^n \log p(\varepsilon_i | N_i, \boldsymbol{\theta})$ , where  $n$  is the number

454 of trials in the subject's data set,  $\varepsilon_i$  the estimation error on the  $i^{\text{th}}$  trial, and  $N_i$  the set size on that

455 trial. To reduce the risk of converging into a local maximum, initial parameter estimates were

456 chosen based on a coarse grid search over a large range of parameter values. The predicted

457 estimation error distribution for a given parameter vector  $\boldsymbol{\theta}$  was computed as follows. First,  $\bar{J}_{\text{optimal}}$

458 was computed by applying Matlab's `fminsearch` function to Eq. (5). In this process, the integrals

459 over  $\varepsilon$  and  $J$  were approximated numerically by discretizing the distributions of these variables into

460 100 and 20 equal-probability bins, respectively. Next, the gamma distribution over precision with

461 mean  $\bar{J}_{\text{optimal}}$  and scale parameter  $\tau$  was discretized into 20 equal-probability bins. Thereafter, the

462 predicted estimation error distribution was computed under the central value of each bin. Finally,

463 these 20 predicted distributions were averaged. We verified that our results are robust under

464 changes in the number of bins used in the numerical approximations.

465 *Change detection.* Model fitting in the change detection task consisted of finding parameter  
466 vector  $\theta = \{\tilde{\lambda}, \tau, p_{\text{change}}\}$  that maximizes  $\sum_{i=1}^n \log p(R_i | \Delta_i, N_i, \theta)$ , where  $n$  is the number of trials in  
467 the subject's data set,  $R_i$  is the response ("change" or "no change"),  $\Delta_i$  the magnitude of change, and  
468  $N_i$  the set size on the  $i^{\text{th}}$  trial. For computational convenience,  $\Delta$  was discretized into 30 equally  
469 spaced bins. To find the maximum-likelihood parameters, we first created a table with predicted  
470 probabilities of "change" responses for a large range of  $(\bar{J}, \tau, p_{\text{change}})$  triplets. One such table was  
471 created for each possible  $(\Delta, N)$  pair. Each value  $p(R=\text{"change"} | N, \Delta, \bar{J}, \tau, p_{\text{change}})$  in these tables  
472 was approximated using the optimal decision rule (see Supplementary Information) applied to  
473 10,000 Monte Carlo samples. Next, for a given set of parameter values, the log likelihood of each  
474 trial response was computed in two steps. First, the expected total loss was computed as a function  
475 of  $\bar{J}$ , using  $\bar{L}_{\text{total}}(\bar{J}, N) = p_{\text{incorrect}}(\bar{J}, N) + \tilde{\lambda} \bar{J} N$ , where  $p_{\text{incorrect}}(\bar{J}, N)$  was estimated using the pre-  
476 computed tables. Second, we looked up  $\log p(R_i | N_i, \Delta_i, \bar{J}_{\text{optimal}}, \tau, p_{\text{change}})$  from the pre-computed  
477 tables, where  $\bar{J}_{\text{optimal}}$  is the value of  $\bar{J}$  for which expected total loss was lowest. To estimate the  
478 best-fitting parameters, we performed a grid search over a large set of parameter combinations,  
479 separately for each subject.

480 *Change localization and visual search.* Model fitting methods for the change-localization  
481 and visual-search tasks were identical to the methods for the change-detection task, except for  
482 differences in the parameter vectors (no prior in the change localization task;  $p_{\text{present}}$  instead of  
483  $p_{\text{change}}$  in visual search) and the optimal decision rules (see Supplementary Information).

484

## 485 REFERENCES

- 486 Akaike, H. (1974). A new look at the statistical model identification. *IEEE Transactions on*  
487 *Automatic Control*, 19(6). <https://doi.org/10.1109/TAC.1974.1100705>
- 488 Attneave, F. (1954). Some informational aspects of visual perception. *Psychological Review*, 61(3),  
489 183–193. <https://doi.org/10.1037/h0054663>
- 490 Attwell, D., & Laughlin, S. B. (2001). An energy budget for signaling in the grey matter of the  
491 brain. *Journal of Cerebral Blood Flow and Metabolism : Official Journal of the International*  
492 *Society of Cerebral Blood Flow and Metabolism*, 21(10), 1133–1145.  
493 <https://doi.org/10.1097/00004647-200110000-00001>

- 494 Bae, G., Allred, S. R., Wilson, C., & Flombaum, J. I. (2014). Stimulus-specific variability in color  
495 working memory with delayed estimation. *Journal of Vision*, *14*(4), 1–23.  
496 <https://doi.org/10.1167/14.4.7>.doi
- 497 Baldassi, S., & Simoncini, C. (2011). Reward sharpens orientation coding independently of  
498 attention. *Frontiers in Neuroscience*, (FEB). <https://doi.org/10.3389/fnins.2011.00013>
- 499 Barlow, H. B. H. (1961). Possible principles underlying the transformation of sensory messages. In  
500 *Sensory Communication* (pp. 217–234). <https://doi.org/10.1080/15459620490885644>
- 501 Bays, P. M. (2014). Noise in neural populations accounts for errors in working memory. *The*  
502 *Journal of Neuroscience : The Official Journal of the Society for Neuroscience*, *34*(10), 3632–  
503 45. <https://doi.org/10.1523/JNEUROSCI.3204-13.2014>
- 504 Bays, P. M., Catalao, R. F. G., & Husain, M. (2009). The precision of visual working memory is set  
505 by allocation of a shared resource. *Journal of Vision*, *9*(10), 7.1-11.  
506 <https://doi.org/10.1167/9.10.7>
- 507 Bays, P. M., & Husain, M. (2008). Dynamic shifts of limited working memory resources in human  
508 vision. *Science*, *321*(5890), 851–4. <https://doi.org/10.1126/science.1158023>
- 509 Beck, J. M., Ma, W. J., Pitkow, X., Latham, P. E., & Pouget, A. (2012). Not Noisy, Just Wrong:  
510 The Role of Suboptimal Inference in Behavioral Variability. *Neuron*.  
511 <https://doi.org/10.1016/j.neuron.2012.03.016>
- 512 Brady, T. F., Konkle, T., Gill, J., Oliva, A., & Alvarez, G. a. (2013). Visual long-term memory has  
513 the same limit on fidelity as visual working memory. *Psychological Science*, *24*(6), 981–90.  
514 <https://doi.org/10.1177/0956797612465439>
- 515 Carandini, M., & Heeger, D. (2012). Normalization as a canonical neural computation. *Nature*  
516 *Reviews Neuroscience*, (November), 1–12. <https://doi.org/10.1038/nrn3136>
- 517 Cherniak, C. (1994). Component placement optimization in the brain. *The Journal of*  
518 *Neuroscience : The Official Journal of the Society for Neuroscience*, *14*(April), 2418–2427.  
519 [https://doi.org/10.1016/S0166-2236\(96\)84416-X](https://doi.org/10.1016/S0166-2236(96)84416-X)
- 520 Chklovskii, D. B., Schikorski, T., & Stevens, C. F. (2002). Wiring optimization in cortical circuits.  
521 *Neuron*. [https://doi.org/10.1016/S0896-6273\(02\)00679-7](https://doi.org/10.1016/S0896-6273(02)00679-7)
- 522 Christie, S. T., & Schrater, P. (2015). Cognitive cost as dynamic allocation of energetic resources.  
523 *Frontiers in Neuroscience*, *9*(JUL). <https://doi.org/10.3389/fnins.2015.00289>
- 524 Clune, J., Mouret, J.-B., & Lipson, H. (2013). The evolutionary origins of modularity. *Proceedings*  
525 *of the Royal Society B: Biological Sciences*, *280*(1755), 20122863–20122863.

- 526 <https://doi.org/10.1098/rspb.2012.2863>
- 527 Cover, T. M., & Thomas, J. A. (2005). *Elements of Information Theory. Elements of Information*  
528 *Theory*. <https://doi.org/10.1002/047174882X>
- 529 Della Libera, C., & Chelazzi, L. (2006). Visual selective attention and the effects of monetary  
530 rewards. *Psychological Science : A Journal of the American Psychological Society / APS*,  
531 *17*(3), 222–227. <https://doi.org/10.1111/j.1467-9280.2006.01689.x>
- 532 Devkar, D. T., & Wright, A. A. (2015). The same type of visual working memory limitations in  
533 humans and monkeys. *Journal of Vision*, *13*(2015), 1–18. <https://doi.org/10.1167/15.16.13>.doi
- 534 Donkin, C., Kary, A., Tahir, F., & Taylor, R. (2016). Resources masquerading as slots: Flexible  
535 allocation of visual working memory. *Cognitive Psychology*, *85*, 30–42.  
536 <https://doi.org/10.1016/j.cogpsych.2016.01.002>
- 537 Dyrholm, M., Kyllingsbæk, S., Espeseth, T., & Bundesen, C. (2011). Generalizing parametric  
538 models by introducing trial-by-trial parameter variability: The case of TVA. *Journal of*  
539 *Mathematical Psychology*, *55*(6), 416–429. <https://doi.org/10.1016/j.jmp.2011.08.005>
- 540 Elmore, L. C., Ji Ma, W., Magnotti, J. F., Leising, K. J., Passaro, A. D., Katz, J. S., & Wright, A. A.  
541 (2011). Visual short-term memory compared in rhesus monkeys and humans. *Current Biology*,  
542 *21*(11), 975–979. <https://doi.org/10.1016/j.cub.2011.04.031>
- 543 Endress, A., & Szabó, S. (2017). Interference and memory capacity limitations. *Psychological*  
544 *Review*, *In press*.
- 545 Faisal, A. A., Selen, L. P. J., & Wolpert, D. M. (2008). Noise in the nervous system. *Nature*  
546 *Reviews. Neuroscience*, *9*, 292–303. <https://doi.org/10.1038/nrn2258>
- 547 Fougnie, D., Suchow, J. W., & Alvarez, G. A. (2012). Variability in the quality of visual working  
548 memory. *Nature Communications*, *3*, 1229. <https://doi.org/10.1038/ncomms2237>
- 549 Funahashi, S., Bruce, C. J., & Goldman-Rakic, P. S. (1989). Mnemonic coding of visual space in  
550 the monkey's dorsolateral prefrontal cortex. *Journal of Neurophysiology*, *61*(2), 331–349.  
551 <https://doi.org/10.1016/j.neuron.2012.12.039>
- 552 Fuster, J. M., & Alexander, G. E. (1971). Neuron Activity Related to Short-Term Memory. *Science*.  
553 <https://doi.org/10.1126/science.173.3997.652>
- 554 Ganguli, D., & Simoncelli, E. P. (2010). Implicit encoding of prior probabilities in optimal neural  
555 populations. *Advances in Neural Information Processing Systems*, *2010*(December 2010),  
556 658–666. Retrieved from  
557 <http://www.pubmedcentral.nih.gov/articlerender.fcgi?artid=4209846&tool=pmcentrez&rendert>

- 558           type=abstract
- 559   Geisler, W. S. (2011). Contributions of ideal observer theory to vision research. *Vision Research*.
- 560           <https://doi.org/10.1016/j.visres.2010.09.027>
- 561   Girshick, A. R., Landy, M. S., & Simoncelli, E. P. (2011). Cardinal rules: visual orientation
- 562           perception reflects knowledge of environmental statistics. *Nature Neuroscience*, *14*(7), 926–
- 563           932. <https://doi.org/10.1038/nn.2831>
- 564   Green, D. M., & Swets, J. A. (1966). Signal detection theory and psychophysics. *Society*, *1*, 521.
- 565           <https://doi.org/10.1901/jeab.1969.12-475>
- 566   JASP\_Team. (2017). JASP (Version 0.8.2) [Computer program].
- 567   Keshvari, S., van den Berg, R., & Ma, W. J. (2012). Probabilistic computation in human perception
- 568           under variability in encoding precision. *PLoS ONE*, *7*(6).
- 569   Keshvari, S., van den Berg, R., & Ma, W. J. (2013). No Evidence for an Item Limit in Change
- 570           Detection. *PLoS Computational Biology*, *9*(2).
- 571   Klyszejko, Z., Rahmati, M., & Curtis, C. E. (2014). Attentional priority determines working
- 572           memory precision. *Vision Research*, *105*, 70–76. <https://doi.org/10.1016/j.visres.2014.09.002>
- 573   Körding, K. (2007). Decision theory: what “should” the nervous system do? *Science (New York,*
- 574           *N.Y.)*, *318*, 606–610. <https://doi.org/10.1126/science.1142998>
- 575   Krajbich, I., & Rangel, A. (2011). Multialternative drift-diffusion model predicts the relationship
- 576           between visual fixations and choice in value-based decisions. *Proceedings of the National*
- 577           *Academy of Sciences*, *108*(33), 13852–13857. <https://doi.org/10.1073/pnas.1101328108>
- 578   Lennie, P. (2003). The cost of cortical computation. *Current Biology*, *13*(6), 493–497.
- 579           [https://doi.org/10.1016/S0960-9822\(03\)00135-0](https://doi.org/10.1016/S0960-9822(03)00135-0)
- 580   Lindsay, P. H., Taylor, M. M., & Forbes, S. M. (1968). Attention and multidimensional
- 581           discrimination. *Perception & Psychophysics*, *1*, 4(2), 113–117.
- 582   Liu, Y. S., Stevens, C. F., & Sharpee, T. (2009). Predictable irregularities in retinal receptive fields.
- 583           *Proceedings of the National Academy of Sciences*, *106*(38), 16499–16504.
- 584           <https://doi.org/10.1073/pnas.0908926106>
- 585   Ma, W. J., Beck, J. M., Latham, P. E., & Pouget, A. (2006). Bayesian inference with probabilistic
- 586           population codes. *Nature Neuroscience*, *9*(11), 1432–1438. <https://doi.org/10.1038/nn1790>
- 587   Ma, W. J., & Huang, W. (2009). No capacity limit in attentional tracking: evidence for probabilistic
- 588           inference under a resource constraint. *Journal of Vision*, *9*(11), 3.1-30.
- 589           <https://doi.org/10.1167/9.11.3>

- 590 Ma, W. J., Husain, M., & Bays, P. M. (2014). Changing concepts of working memory. *Nature*  
591 *Neuroscience*, 17(3), 347–56. <https://doi.org/10.1038/nn.3655>
- 592 Mankiw, N. G. (2004). *Principles of economics. Book* (Vol. 328).  
593 <https://doi.org/10.1017/CBO9780511511455>
- 594 Mazzyar, H., van den Berg, R., & Ma, W. J. (2012). Does precision decrease with set size? *Journal*  
595 *of Vision*, 12(6), 10. <https://doi.org/10.1167/12.6.10>
- 596 Mazzyar, H., Van den Berg, R., Seilheimer, R. L., & Ma, W. J. (2013). Independence is elusive : Set  
597 size effects on encoding precision in visual search. *Journal of Vision*, 13(5), 1–14.  
598 <https://doi.org/10.1167/13.5.8.doi>
- 599 Mongillo, G., Barak, O., & Tsodyks, M. (2008). Synaptic Theory of Working Memory. *Science*,  
600 319(5869), 1543–1546. <https://doi.org/10.1126/science.1150769>
- 601 Nairne, J. S. (1990). A feature model of immediate memory. *Memory & Cognition*, 18(3), 251–269.  
602 <https://doi.org/10.3758/BF03213879>
- 603 Oberauer, K., Farrell, S., Jarrold, C., & Lewandowsky, S. (2016). What Limits Working Memory  
604 Capacity? *Psychological Bulletin*, 142(March), 758–799. <https://doi.org/10.1037/bul0000046>
- 605 Oberauer, K., & Lin, H. (2017). An Interference Model of Visual Working Memory. *Psychological*  
606 *Review*, 124(1), 21–59. <https://doi.org/10.1037/rev0000044>
- 607 Olshausen, B. A., & Field, D. J. (1996). Emergence of simple-cell receptive field properties by  
608 learning a sparse code for natural images. *Nature*, 381(6583), 607–609.  
609 <https://doi.org/10.1038/381607a0>
- 610 Orhan, A. E., & Ma, W. J. (2015). Neural Population Coding of Multiple Stimuli. *Journal of*  
611 *Neuroscience*, 35(9), 3825–3841. <https://doi.org/10.1523/JNEUROSCI.4097-14.2015>
- 612 Orhan, A. E., Sims, C. R., Jacobs, R. A., Knill, D. C., & Orhan, E. (2014). The adaptive nature of  
613 visual working memory. *Current Directions in Psychological Science*, 23(3), 164–170.  
614 <https://doi.org/10.1177/0963721414529144>
- 615 Palmer, J. (1990). Attentional limits on the perception and memory of visual information. *Journal*  
616 *of Experimental Psychology. Human Perception and Performance*, 16(2), 332–350.  
617 <https://doi.org/10.1037/0096-1523.16.2.332>
- 618 Palmer, J. (1994). Set-size effects in visual search: The effect of attention is independent of the  
619 stimulus for simple tasks. *Vision Research*, 34(13). [https://doi.org/10.1016/0042-](https://doi.org/10.1016/0042-6989(94)90128-7)  
620 [6989\(94\)90128-7](https://doi.org/10.1016/0042-6989(94)90128-7)
- 621 Paradiso, M. a. (1988). A theory for the use of visual orientation information which exploits the

- 622 columnar structure of striate cortex. *Biological Cybernetics*, 58(1), 35–49.  
623 <https://doi.org/10.1007/BF00363954>
- 624 Peck, C. J., Jangraw, D. C., Suzuki, M., Efem, R., & Gottlieb, J. (2009). Reward modulates  
625 attention independently of action value in posterior parietal cortex. *The Journal of*  
626 *Neuroscience : The Official Journal of the Society for Neuroscience*, 29(36), 11182–11191.  
627 <https://doi.org/10.1523/JNEUROSCI.1929-09.2009>
- 628 Pertzov, Y., Manohar, S., & Husain, M. (2017). Rapid forgetting results from competition over time  
629 between items in visual working memory. *Journal of Experimental Psychology: Learning,*  
630 *Memory, and Cognition*, 43(4), 528–536. <https://doi.org/10.1037/xlm0000328>
- 631 Pestilli, F., & Carrasco, M. (2005). Attention enhances contrast sensitivity at cued and impairs it at  
632 uncued locations. *Vision Research*, 45(14), 1867–1875.  
633 <https://doi.org/10.1016/j.visres.2005.01.019>
- 634 Reynolds, J. H., & Heeger, D. J. (2009). The Normalization Model of Attention. *Neuron*.  
635 <https://doi.org/10.1016/j.neuron.2009.01.002>
- 636 Scalf, P. E., & Beck, D. M. (2010). Competition in visual cortex impedes attention to multiple  
637 items. *The Journal of Neuroscience : The Official Journal of the Society for Neuroscience*,  
638 30(1), 161–169. <https://doi.org/10.1523/JNEUROSCI.4207-09.2010>
- 639 Seung, H. S., & Sompolinsky, H. (1993). Simple models for reading neuronal population codes.  
640 *Proc.Natl.Acad.Sci.*, 90(22), 10749–10753. <https://doi.org/10.1073/pnas.90.22.10749>
- 641 Sewell, D. K., Lilburn, S. D., & Smith, P. L. (2014). An information capacity limitation of visual  
642 short-term memory. *J Exp Psychol Hum Percept Perform*, 40(6), 2214–2242.  
643 <https://doi.org/10.1037/a0037744>
- 644 Shaw, M. L. (1980). Identifying attentional and decision-making components in information  
645 processing. In R. S. Nickerson (Ed.), *Attention and performance VIII* (pp. 277–296). Hillsdale,  
646 NJ, NJ: Erlbaum.
- 647 Shen, S., & Ma, W. J. (2016). A detailed comparison of optimality and simplicity in perceptual  
648 decision making. *Psychological Review*, 123(4), 452–480. <https://doi.org/10.1037/rev0000028>
- 649 Shin, H., & Ma, W. J. (2016). Crowdsourced single-trial probes of visual working memory for  
650 irrelevant features Laboratory experiments. *Journal of Vision*, 16(5)(10), 1–8.  
651 <https://doi.org/10.1167/16.5.10>
- 652 Simmering, V. R. (2012). The development of visual working memory capacity during early  
653 childhood. *Journal of Experimental Child Psychology*, 111(4), 695–707.



- 654 <https://doi.org/10.1016/j.jecp.2011.10.007>
- 655 Simmering, V. R., & Perone, S. (2012). Working memory capacity as a dynamic process. *Frontiers*  
656 *in Psychology*, 3(January), 567. <https://doi.org/10.3389/fpsyg.2012.00567>
- 657 Simon, H. A. (1957). *Models of Man (Book)*. *Operations Research* (Vol. 5).  
658 <https://doi.org/10.2307/2281884>
- 659 Sims, C. A. (2003). Implications of rational inattention. *Journal of Monetary Economics*, 50(3),  
660 665–690. [https://doi.org/10.1016/S0304-3932\(03\)00029-1](https://doi.org/10.1016/S0304-3932(03)00029-1)
- 661 Sims, C. R. (2015). The cost of misremembering: Inferring the loss function in visual working  
662 memory. *Journal of Vision*, 15(3), 2. <https://doi.org/10.1167/15.3.2.doi>
- 663 Sims, C. R. (2016). Rate–distortion theory and human perception. *Cognition*, 152, 181–198.
- 664 Sims, C. R., Jacobs, R. A., & Knill, D. C. (2012). An ideal observer analysis of visual working  
665 memory. *Psychological Review*, 119(4), 807–30. <https://doi.org/10.1037/a0029856>
- 666 Smith, P. L. (2015). The Poisson shot noise model of visual short-term memory and choice response  
667 time: Normalized coding by neural population size. *Journal of Mathematical Psychology*, 66,  
668 41–52. <https://doi.org/10.1016/j.jmp.2015.03.007>
- 669 Sterling, P., & Laughlin, S. (2015). *Principles of neural design*. MIT Press.
- 670 van den Berg, R., Awh, E., & Ma, W. J. (2014). Factorial comparison of working memory models.  
671 *Psychological Review*, 121(1), 124–49. <https://doi.org/10.1037/a0035234>
- 672 van den Berg, R., Shin, H., Chou, W.-C., George, R., & Ma, W. J. (2012). Variability in encoding  
673 precision accounts for visual short-term memory limitations. *Proceedings of the National*  
674 *Academy of Sciences*. <https://doi.org/10.1073/pnas.1117465109>
- 675 Vincent, B. T., Baddeley, R. J., Troscianko, T., & Gilchrist, I. D. (2005). Is the early visual system  
676 optimised to be energy efficient? *Network*, 16, 175–190.  
677 <https://doi.org/10.1080/09548980500290047>
- 678 Wei, X.-X., & Stocker, A. A. (2015). A Bayesian observer model constrained by efficient coding  
679 can explain “anti-Bayesian” percepts. *Nature Neuroscience*, 18(10), 1509–1517.  
680 <https://doi.org/10.1038/nn.4105>
- 681 Wei, Z., Wang, X.-J., & Wang, D.-H. (2012). From Distributed Resources to Limited Slots in  
682 Multiple-Item Working Memory: A Spiking Network Model with Normalization. *The Journal*  
683 *of Neuroscience*, 32(33), 11228–11240. <https://doi.org/10.1523/JNEUROSCI.0735-12.2012>
- 684 Wilken, P., & Ma, W. J. (2004). A detection theory account of change detection. *Journal of Vision*,  
685 4(12), 1120–35. <https://doi.org/10.1167/4.12.11>

- 686 Wolpert, D. M., & Landy, M. S. (2012). Motor control is decision-making. *Current Opinion in*  
687 *Neurobiology*. <https://doi.org/10.1016/j.conb.2012.05.003>
- 688 Yi, D.-J., Woodman, G. F., Widders, D., Marois, R., & Chun, M. M. (2004). Neural fate of ignored  
689 stimuli: dissociable effects of perceptual and working memory load. *Nature Neuroscience*,  
690 7(9), 992–996. <https://doi.org/10.1038/nn1294>
- 691 Zhang, W., & Luck, S. J. (2008). Discrete fixed-resolution representations in visual working  
692 memory. *Nature*, 453(7192), 233–235. <https://doi.org/10.1038/nature06860>
- 693 Zhang, W., & Luck, S. J. (2011). The Number and Quality of Representations in Working Memory.  
694 *Psychological Science*, 22(11), 1434–1441. <https://doi.org/10.1177/0956797611417006>  
695  
696

697 **SUPPLEMENTARY INFORMATION**

698  
699 **A rational theory of set size effects in working memory and attention**

700 Ronald van den Berg & Wei Ji Ma

701

702 **Contents**

703 MODEL DETAILS ..... 27

704 Relation between  $J$  and  $\kappa$ ..... 27

705 Variable precision ..... 27

706 Expected behavioral loss function by task ..... 28

707 The behavioral loss function drops out when the behavioral error is binary ..... 30

708 Conditions under which optimal precision declines with set size..... 30

709 PARAMETER ESTIMATES..... 32

710 SUPPLEMENTARY REFERENCES..... 32

711 SUPPLEMENTARY FIGURES ..... 34

712

713 **MODEL DETAILS**

714 **Relation between  $J$  and  $\kappa$**

715 We measure encoding precision as Fisher Information, denoted  $J$ . As derived in earlier work  
716 (Keshvari, van den Berg, & Ma, 2012), the mapping between  $J$  and the concentration parameter  $\kappa$  of

717 a Von Mises encoding noise distribution is  $J(\kappa) = \kappa \frac{I_1(\kappa)}{I_0(\kappa)}$ , where  $I_1$  is the modified Bessel

718 function of the first kind of order 1. Larger values of  $J$  map to larger values of  $\kappa$ , corresponding to  
719 narrower noise distributions.

720

721 **Variable precision**

722 In all our models, we incorporated variability in precision (Fougnie, Suchow, & Alvarez, 2012; van  
723 den Berg, Shin, Chou, George, & Ma, 2012) by drawing the precision for each encoded item  
724 independently from a Gamma distribution with mean  $\bar{J}$  and scale parameter  $\tau$ . We denote the

725 distribution of a single precision value by  $p(J|\bar{J},\tau)$  and the joint distribution of the precision

726 values of all  $N$  items in a display by  $p(\mathbf{J}|\bar{J},\tau) = \prod_{i=1}^N p(J_i|\bar{J},\tau)$ .

727

### 728 **Expected behavioral loss function by task**

729 As a consequence of variability in precision, computation of expected behavioral loss requires  
730 integration over both the behavioral error,  $\varepsilon$ , and the vector with precision values,  $\mathbf{J}$ ,

$$731 \quad \bar{L}_{\text{behavioral}}(\bar{J}, N) = \begin{cases} \sum_{\varepsilon} \int_0^{\infty} L_{\text{behavioral}}(\varepsilon) p(\varepsilon|\mathbf{J}, N) p(\mathbf{J}|\bar{J}, \tau) d\mathbf{J} & \text{if } \varepsilon \text{ is discrete} \\ \int_0^{\infty} \int_0^{\infty} L_{\text{behavioral}}(\varepsilon) p(\varepsilon|\mathbf{J}, N) p(\mathbf{J}|\bar{J}, \tau) d\mathbf{J} d\varepsilon & \text{if } \varepsilon \text{ is continuous} \end{cases}$$

732 The distribution of precision,  $p(\mathbf{J}|\bar{J},\tau)$ , is the same in all models, but  $L_{\text{behavioral}}(\varepsilon)$  and  $p(\varepsilon|\mathbf{J},N)$  are  
733 task-specific. We next specify these two components separately for each task.

734 *Delayed estimation.* In delayed estimation, the behavioral error only depends on the memory  
735 representation of the target item. We assume that this representation is corrupted by Von Mises  
736 noise,

$$737 \quad p(\varepsilon|\mathbf{J}, N) = p(\varepsilon|J_T) = \frac{1}{2\pi I_0(F(J_T))} e^{F(J_T)\cos(\varepsilon)},$$

738 where  $J_T$  is the precision of the target item and  $F(\cdot)$  maps Fisher Information to a concentration  
739 parameter  $\kappa$ ; we implement this mapping by numerically inverting the mapping specified in the  
740 previous section. Furthermore, the behavioral loss function is assumed to be a power-law function  
741 of the absolute estimation error,  $L_{\text{behavioral}}=|\varepsilon|^\beta$ , where  $\beta>0$  is a free parameter.

742 *Change detection.* We assume that subjects report “change present” whenever the posterior  
743 ratio for a change exceeds 1,

$$744 \quad \frac{p(\text{change present}|\mathbf{x},\mathbf{y})}{p(\text{change absent}|\mathbf{x},\mathbf{y})} > 1,$$

745 where  $\mathbf{x}$  and  $\mathbf{y}$  denote the vectors of noisy measurements of the stimuli in the first and second  
746 displays, respectively. Under the Von Mises assumption, this rule evaluates to (Keshvari, van den  
747 Berg, & Ma, 2013)

748 
$$\frac{p_{\text{change}}}{1 - p_{\text{change}}} \frac{1}{N} \sum_{i=1}^N \frac{I_0(\kappa_{x,i}) I_0(\kappa_{y,i})}{I_0(\sqrt{\kappa_{x,i}^2 + \kappa_{x,i}^2 + 2\kappa_{x,i}\kappa_{y,i} \cos(y_i - x_i)})} > 1,$$

749 where  $p_{\text{change}}$  is a free parameter representing the subject's prior belief that a change will occur, and  
 750  $\kappa_{x,i}$  and  $\kappa_{y,i}$  denote the concentration parameters of the Von Mises distributions associated with the  
 751 observations of the stimuli at the  $i^{\text{th}}$  location in the first and second displays, respectively.

752 The behavioral error,  $\varepsilon$ , takes only two values in this task: correct and incorrect. We assume  
 753 that observers map each of these values to a loss value,

754

755 
$$L_{\text{behavioral}}(\varepsilon) = \begin{cases} L_{\text{incorrect}} & \text{if } \varepsilon \text{ is "incorrect"} \\ L_{\text{correct}} & \text{if } \varepsilon \text{ is "correct"}. \end{cases}$$

756

757 For example, an observer might assign a loss of 0 to any correct decision and a loss of 1 to any  
 758 incorrect decision. The expected behavioral loss is a weighted sum of  $L_{\text{incorrect}}$  and  $L_{\text{correct}}$ ,

759

760 
$$\bar{L}_{\text{behavioral}}(\bar{J}, N) = p_{\text{correct}}(\bar{J}, N) L_{\text{correct}} + (1 - p_{\text{correct}}(\bar{J}, N)) L_{\text{incorrect}},$$

761

762 where  $p_{\text{correct}}(\bar{J}, N)$  is the probability of a correct decision. This probability is not analytic, but can  
 763 be easily be approximated using Monte Carlo simulations.

764 *Change localization.* Expected behavioral loss is computed in the same way as in the  
 765 change-detection task, except that a different decision rule must be used to compute  $p_{\text{correct}}(\bar{J}, N)$ .

766 As shown in earlier work (van den Berg et al., 2012), the Bayes-optimal rule for the change-

767 localization task is to report the location that maximizes 
$$\frac{I_0(\kappa_{x,i}) I_0(\kappa_{y,i})}{I_0(\sqrt{\kappa_{x,i}^2 + \kappa_{x,i}^2 + 2\kappa_{x,i}\kappa_{y,i} \cos(y_i - x_i)})},$$

768 where all terms are defined in the same way as in the model for the change-detection task.

769 *Visual search.* The expected behavioral loss in the model for visual search is also computed  
 770 in the same way as in the model for change detection, again with the only difference being the  
 771 decision rule used to compute  $p_{\text{correct}}(\bar{J}, N)$ . The Bayes-optimal rule for this task is to report “target

772 present” when  $\frac{p_{\text{present}}}{1 - p_{\text{present}}} \frac{I_0(\kappa_D) e^{\kappa_i \cos(x_i - s_T)}}{I_0\left(\sqrt{\kappa_i^2 + \kappa_D^2 + 2\kappa_i \kappa_D \cos(x_i - s_T)}\right)}$ , where  $p_{\text{present}}$  is the subject’s prior

773 belief that the target will be present,  $\kappa_D$  the concentration parameter of the distribution from which  
 774 the distractors are drawn,  $\kappa_i$  the concentration parameter of the noise distribution associated to the  
 775 stimulus at location  $i$ ,  $x_i$  the noisy observation of the stimulus at location  $i$ , and  $s_T$  the value of the  
 776 target (see (Mazyar, Van den Berg, Seilheimer, & Ma, 2013) for a derivation).

777  
 778 **The behavioral loss function drops out when the behavioral error is binary**

779 When the behavioral error  $\varepsilon$  takes only two values, the behavioral loss can also take only two  
 780 values. The integral in the expected behavioral loss (Eq (2) in the main text) then simplifies to a  
 781 sum of two terms,

782  
 783 
$$\begin{aligned} \bar{L}_{\text{behavioral}}(\bar{J}, N) &= p_{\text{correct}}(\bar{J}, N) L_{\text{correct}} + (1 - p_{\text{correct}}(\bar{J}, N)) L_{\text{incorrect}} \\ &= p_{\text{correct}}(\bar{J}, N) (L_{\text{correct}} - L_{\text{incorrect}}) + L_{\text{incorrect}}. \end{aligned}$$

784  
 785 The optimal (loss-minimizing) value of  $\bar{J}$  is then

786  
 787 
$$\begin{aligned} \bar{J}_{\text{optimal}}(N) &= \underset{\bar{J}}{\operatorname{argmin}} \left[ p_{\text{correct}}(\bar{J}, N) (L_{\text{correct}} - L_{\text{incorrect}}) + L_{\text{incorrect}} + \tilde{\lambda} \bar{L}_{\text{neural}}(\bar{J}, N) \right] \\ &= \underset{\bar{J}}{\operatorname{argmin}} \left[ p_{\text{correct}}(\bar{J}, N) \Delta_L + \tilde{\lambda} \bar{L}_{\text{neural}}(\bar{J}, N) \right], \end{aligned}$$

788  
 789 where  $\Delta_L \equiv L_{\text{correct}} - L_{\text{incorrect}}$ . Since  $\Delta_L$  and  $\tilde{\lambda}$  have interchangeable effects on  $\bar{J}_{\text{optimal}}$ , we fix  $\Delta_L$  to 1  
 790 and fit only  $\tilde{\lambda}$  as a free parameter.

791  
 792 **Conditions under which optimal precision declines with set size**

793 In this section, we show that when the expected behavioral loss is independent of set size (as in  
 794 single-probe delayed estimation and change detection), the rational model predicts optimal  
 795 precision to decline with set size whenever the following four conditions are satisfied:

- 796 1) The expected behavioral loss is a strictly decreasing function of encoding precision, i.e., an  
 797 increase in precision results in an increase in behavioral performance.

798 2) The expected behavioral loss is subject to a law of diminishing returns (Mankiw, 2004): the  
 799 behavioral benefit obtained from a unit increase in precision decreases with precision. This  
 800 law will hold when condition 1 holds and the loss function is bounded from below, which is  
 801 generally the case as errors cannot be negative.  
 802 3) The expected neural loss is an increasing function of encoding precision.  
 803 4) The expected neural loss per unit of precision is a non-decreasing function of precision. On  
 804 the premise that precision is proportional to spike rate (Paradiso, 1988; Seung &  
 805 Sompolinsky, 1993), this condition is satisfied if loss per spike increases with spike rate,  
 806 which has been found to be the case (Sterling & Laughlin, 2015).  
 807 These conditions translate to the following constraints on the first and second derivatives of the  
 808 expected loss functions,

1.  $\bar{L}'_{\text{behavioral}}(\bar{J}) < 0$
2.  $\bar{L}''_{\text{behavioral}}(\bar{J}) > 0$
3.  $\bar{L}'_{\text{neural}}(\bar{J}) > 0$
4.  $\bar{L}''_{\text{neural}}(\bar{J}) \geq 0$ .

810 The loss-minimizing value of precision is found by setting the derivative of the expected total loss  
 811 function to 0,

$$0 = \bar{L}'_{\text{total}}(\bar{J}) = \bar{L}'_{\text{behavioral}}(\bar{J}) + \tilde{\lambda}N\bar{L}'_{\text{neural}}(\bar{J}),$$

812  
 813  
 814  
 815 which is equivalent to

$$-\frac{\bar{L}'_{\text{behavioral}}(\bar{J})}{\bar{L}'_{\text{neural}}(\bar{J})} = \tilde{\lambda}N. \quad (\text{S5})$$

817  
 818 The left-hand side is strictly positive for any  $\bar{J}$ , because of constraints 1 and 3 above. In addition, it  
 819 is a strictly decreasing function of  $\bar{J}$ , because

$$-\frac{d}{d\bar{J}} \frac{\bar{L}'_{\text{behavioral}}(\bar{J})}{\bar{L}'_{\text{neural}}(\bar{J})} = \frac{\bar{L}''_{\text{behavioral}}(\bar{J})\bar{L}'_{\text{neural}}(\bar{J}) - \bar{L}'_{\text{behavioral}}(\bar{J})\bar{L}''_{\text{neural}}(\bar{J})}{(\bar{L}'_{\text{neural}}(\bar{J}))^2}$$

822 is necessarily greater than 0 due to the four constraints specified above. As illustrated in  
 823 Supplementary Figure S2, Eq. (S5) can be interpreted as the intersection point between the function  
 824 specified by the left-hand side (solid curve) and a flat line at a value  $\tilde{\lambda}N$  (dashed lines). The value  
 825 of  $\bar{J}$  at which this intersection occurs (i.e.,  $\bar{J}_{\text{optimal}}$ ) necessarily decreases with  $N$ .

826 Hence, in tasks where the expected behavioral loss is independent of set size, our model  
 827 predicts a decline of precision with set size whenever the above four, rather general conditions hold.  
 828 When expected behavioral loss does depend on set size (such as in whole-array change detection or  
 829 change localization), the proof above does not apply and we were not able to extend the proof to  
 830 this domain. (Anderson & Awh, 2012) (Anderson, Vogel, & Awh, 2011) (Rademaker, Tredway, &  
 831 Tong, 2012)

## 832 PARAMETER ESTIMATES

833 *Table S1. Subject-averaged parameter estimates of the rational model fitted to data from 11*  
 834 *previously published experiments. See Table 1 in main text for details about the experiments and*  
 835 *references to the papers in which the experiments were originally published.*

| Experiment | $\tilde{\lambda}$               | $\tau$   | $\beta$                       | $P_{\text{change}}$ | $P_{\text{present}}$ |
|------------|---------------------------------|----------|-------------------------------|---------------------|----------------------|
| DE1        | $(4.48 \pm 0.66) \cdot 10^{-3}$ | 16.7±2.1 | 1.97±0.43                     |                     |                      |
| DE2        | $(2.66 \pm 0.28) \cdot 10^{-3}$ | 12.6±1.2 | $(7.1 \pm 1.2) \cdot 10^{-2}$ |                     |                      |
| DE3        | $(3.47 \pm 0.34) \cdot 10^{-3}$ | 17.9±2.1 | 0.228±0.040                   |                     |                      |
| DE4        | $(4.5 \pm 1.0) \cdot 10^{-3}$   | 7.3±1.7  | 0.176±0.064                   |                     |                      |
| DE5        | $(4.15 \pm 0.37) \cdot 10^{-3}$ | 18.5±3.0 | 0.426±0.089                   |                     |                      |
| DE6        | $(4.89 \pm 0.57) \cdot 10^{-3}$ | 7.6±1.4  | 0.66±0.14                     |                     |                      |
| CD1        | $(5.01 \pm 0.98) \cdot 10^{-3}$ | 6.2±1.7  |                               | 0.517±0.007         |                      |
| CD2        | $(2.21 \pm 0.57) \cdot 10^{-3}$ | 27.6±5.6 |                               | 0.526±0.009         |                      |
| CL1        | $(5.93 \pm 0.45) \cdot 10^{-3}$ | 20.9±1.8 |                               |                     |                      |
| CL2        | $(3.64 \pm 0.69) \cdot 10^{-3}$ | 55±12    |                               |                     |                      |
| VS         | $(3.01 \pm 0.04) \cdot 10^{-1}$ | 155±42   |                               |                     | 0.509±0.004          |

836

## 837 SUPPLEMENTARY REFERENCES

838 Anderson, D. E., & Awh, E. (2012). The plateau in mnemonic resolution across large set sizes  
 839 indicates discrete resource limits in visual working memory. *Attention, Perception &*  
 840 *Psychophysics*, 74(5), 891–910. <https://doi.org/10.3758/s13414-012-0292-1>

841 Anderson, D. E., Vogel, E. K., & Awh, E. (2011). Precision in visual working memory reaches a  
 842 stable plateau when individual item limits are exceeded. *The Journal of Neuroscience*, 31(3),  
 843 1128–38. <https://doi.org/10.1523/JNEUROSCI.4125-10.2011>

844 Fougnie, D., Suchow, J. W., & Alvarez, G. A. (2012). Variability in the quality of visual working



845 memory. *Nature Communications*, 3, 1229. <https://doi.org/10.1038/ncomms2237>

846 Keshvari, S., van den Berg, R., & Ma, W. J. (2012). Probabilistic computation in human perception  
847 under variability in encoding precision. *PLoS ONE*, 7(6).

848 Keshvari, S., van den Berg, R., & Ma, W. J. (2013). No Evidence for an Item Limit in Change  
849 Detection. *PLoS Computational Biology*, 9(2).

850 Mankiw, N. G. (2004). *Principles of economics. Book* (Vol. 328).  
851 <https://doi.org/10.1017/CBO9780511511455>

852 Mazyar, H., Van den Berg, R., Seilheimer, R. L., & Ma, W. J. (2013). Independence is elusive : Set  
853 size effects on encoding precision in visual search. *Journal of Vision*, 13(5), 1–14.  
854 <https://doi.org/10.1167/13.5.8>.doi

855 Paradiso, M. a. (1988). A theory for the use of visual orientation information which exploits the  
856 columnar structure of striate cortex. *Biological Cybernetics*, 58(1), 35–49.  
857 <https://doi.org/10.1007/BF00363954>

858 Rademaker, R. L., Tredway, C. H., & Tong, F. (2012). Introspective judgments predict the precision  
859 and likelihood of successful maintenance of visual working memory. *Journal of Vision*,  
860 12(13), 21. <https://doi.org/10.1167/12.13.21>

861 Seung, H. S., & Sompolinsky, H. (1993). Simple models for reading neuronal population codes.  
862 *Proc.Natl.Acad.Sci.*, 90(22), 10749–10753. <https://doi.org/10.1073/pnas.90.22.10749>

863 Sterling, P., & Laughlin, S. (2015). *Principles of neural design*. MIT Press.

864 van den Berg, R., Shin, H., Chou, W.-C., George, R., & Ma, W. J. (2012). Variability in encoding  
865 precision accounts for visual short-term memory limitations. *Proceedings of the National*  
866 *Academy of Sciences*. <https://doi.org/10.1073/pnas.1117465109>

867

868

869 **SUPPLEMENTARY FIGURES**

870

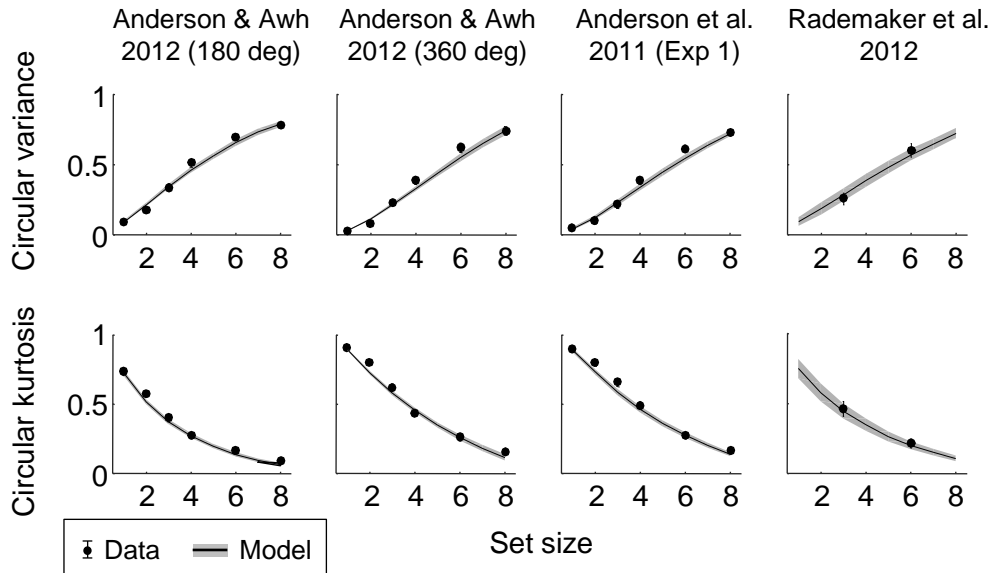

**Supplementary figure S1. Fits to the three delayed-estimation benchmark data sets that were excluded from the main analyses.** Circular variance (top) and circular kurtosis (bottom) of the estimation error distributions as a function of set size, split by experiment. Error bars and shaded areas represent 1 s.e.m. of the mean across subjects. The first three datasets were excluded from the main analyses on the ground that they were published in papers that were later retracted (Anderson & Awh, 2012; Anderson et al. 2011). The Rademaker et al. (2012) dataset was excluded from the main analyses because it contains only two set sizes, which makes it less suitable for a fine-grained study of the relationship between encoding precision and set size.

871

872

873

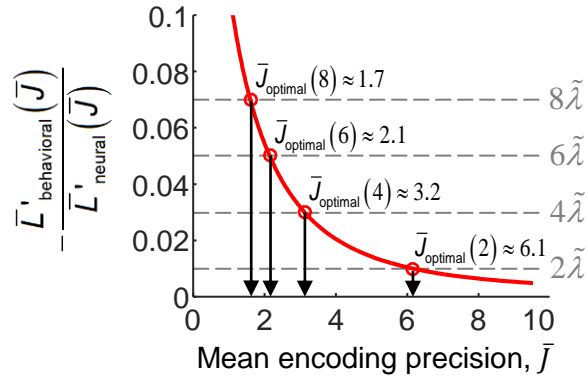

**Figure S2. Graphical illustration of Eq. (S1).** The value of  $\bar{J}$  at which the equality described by Eq. (S1) holds is the intersection point between the function specified by the left-hand side (red curve) and a flat line at a value  $N\tilde{\lambda}$ . Since the left-hand side is strictly positive and also a strictly decreasing function of  $\bar{J}$ , the value at which this intersection occurs (i.e.,  $\bar{J}_{\text{optimal}}$ ) necessarily decreases with  $N$ .

874

875

876

877
